# Supplementary material
Source: PubMed Central journal article supplement (PMC8579027)
Supplement: web_material_kwab077.pdf [file web_material_kwab077.pdf]

## WEB MATERIAL

### Severe Maternal Morbidity: A Comparison of Definitions and Data Sources

Jonathan M. Snowden, Audrey Lyndon, Peiyi Kan, Alison El Ayadi, Elliott Main, and Suzan L. Carmichael

#### Table of Contents

|        |                                                                                                                                                                                   |
|--------|-----------------------------------------------------------------------------------------------------------------------------------------------------------------------------------|
| Page 2 | <b>Web Table 1.</b> Severe maternal morbidity indicators and corresponding ICD-9-CM codes, as defined by the CDC SMM definition and the SMM definition proposed by Bateman et al. |
| Page 4 | <b>Web Table 2.</b> Agreement between SMM definitions as defined by multiple metrics, among 3,049,774 women giving birth in California from 2007 to 2012                          |
| Page 6 | <b>Web References</b>                                                                                                                                                             |

**Web Table 1.** Severe Maternal Morbidity Indicators and Corresponding ICD-9-CM Codes, as Defined by the CDC SMM Definition<sup>1</sup> and the SMM Definition Proposed by Bateman et al.<sup>2</sup>

Yellow – Bateman only

Green – both CDC and Bateman

Blue – CDC only

| Severe Maternal Morbidity Indicator (CDC)                              | Diagnosis (DX) or Procedure (PR) | ICD-9-CM - CDC Exact List                                                      | Bateman (End-Organ Injury List): Show Codes Listed Differently Than in CDC (e.g., #.x) or Not in CDC |
|------------------------------------------------------------------------|----------------------------------|--------------------------------------------------------------------------------|------------------------------------------------------------------------------------------------------|
| Acute congestive heart failure or pulmonary edema                      | DX                               | 518.4, 428.1, 428.0, 428.21, 428.23, 428.31, 428.33, 428.41, 428.43            | 514.xx ('pulm edema'), 415.0x, 428.9x, 669.4x ('acute heart failure')                                |
| Acute myocardial infarction/Aneurysm                                   | DX                               | 410.xx, 441.xx                                                                 |                                                                                                      |
| Acute renal failure                                                    | DX                               | 584.5, 584.6, 584.7, 584.8, 584.9, 669.3x                                      |                                                                                                      |
| Adult respiratory distress syndrome                                    | DX                               | 518.5, 518.81, 518.82, 518.84, 799.1                                           | 518.7x                                                                                               |
| Air and thrombotic embolism                                            | DX                               | 415.1x, 673.0x, 673.2x, 673.3x, 673.8x                                         | '673.x' ('pulm embolism')                                                                            |
| Amniotic fluid embolism                                                | DX                               | 673.1x                                                                         | 673.x                                                                                                |
| Cardiac arrest, ventricular fibrillation/ Conversion of cardiac rhythm | DX; PR                           | 427.41, 427.42, 427.5, 99.6x                                                   | (427.5x = 'acute heart failure')                                                                     |
| Disseminated intravascular coagulation                                 | DX                               | 286.6, 286.9, 666.3                                                            | 286.7x, 287.4                                                                                        |
| Eclampsia                                                              | DX                               | 642.6x                                                                         |                                                                                                      |
| Heart failure or arrest during surgery or procedure                    | DX                               | 997.1                                                                          | see 'acute heart failure'                                                                            |
| Puerperal cerebrovascular disorders                                    | DX                               | 430.xx, 431.xx, 432.xx, 433.xx, 434.xx, 436.xx, 437.xx, 671.5x, 674.0x, 997.02 | 997.01, 325, 348.1, 348.3x, 348.5x, 346.6x                                                           |
| Sepsis                                                                 | DX                               | 038.xx, 995.91, 995.92, 670.2x                                                 | 112.5x, 659.3x, 785.52                                                                               |
| Severe anesthesia complications                                        | DX                               | 668.0x, 668.1x, 668.2x                                                         |                                                                                                      |
| Shock                                                                  | DX                               | 669.1x, 785.5x, 995.0, 995.4, 998.0x                                           | 995.94, 999.4x                                                                                       |
| Sickle cell disease with crisis                                        | DX                               | 282.42, 282.62, 282.64, 282.69                                                 |                                                                                                      |
| Blood transfusion                                                      | PR                               | 99.0x                                                                          |                                                                                                      |
| Hysterectomy                                                           | PR                               | 68.3x-68.9x                                                                    |                                                                                                      |
| Ventilation/Temporary tracheostomy                                     | PR                               | 93.90, 96.01, 96.02, 96.03, 96.05, 31.1                                        |                                                                                                      |
| Acute liver disease                                                    |                                  |                                                                                | 570, 646.7x                                                                                          |
| Coma (Bateman)                                                         |                                  |                                                                                | 780.01, 780.03, 572.2x, 250.2x, 250.3x, 251.0x                                                       |
| Delirium                                                               |                                  |                                                                                | 293.x                                                                                                |
| Status asthmaticus (Bateman)                                           |                                  |                                                                                | 493.01, 493.11, 493.21, 493.91                                                                       |
| Status epilepticus (Bateman)                                           |                                  |                                                                                | 345.3x                                                                                               |

**Web Table 2.** Agreement Between SMM Definitions, as Defined by Multiple Metrics, Among 3,049,774 Women Giving Birth in California From 2007 to 2012<sup>a</sup>

|                                                    | <b>CDC<br/>(Without<br/>Blood<br/>Transfusion)</b><br>Prevalence =<br>0.55%<br>(n = 16,662) | <b>CDC</b><br><br>Prevalence =<br>1.30%<br>(n = 39,753)                          | <b>CDC<br/>(LOS<br/>Restriction)</b><br><br>Prevalence =<br>1.13%<br>(n = 34,413) | <b>CDC<br/>(Bateman<br/>Modification)</b><br><br>Prevalence =<br>0.97%<br>(n = 29,733) | <b>Birth<br/>Certificate,<br/>CDC Analog</b><br><br>Prevalence =<br>0.47%<br>(n = 14,329) | <b>Birth<br/>Certificate,<br/>CDC<br/>Augmented</b><br><br>Prevalence =<br>0.60%<br>(n = 18,329) | <b>Bateman<br/>Index</b><br><br>Prevalence =<br>0.83%<br>(n = 25,275) |
|----------------------------------------------------|---------------------------------------------------------------------------------------------|----------------------------------------------------------------------------------|-----------------------------------------------------------------------------------|----------------------------------------------------------------------------------------|-------------------------------------------------------------------------------------------|--------------------------------------------------------------------------------------------------|-----------------------------------------------------------------------|
| <b>CDC<br/>(Without<br/>Blood<br/>Transfusion)</b> | 1                                                                                           |                                                                                  |                                                                                   |                                                                                        |                                                                                           |                                                                                                  |                                                                       |
| <b>CDC</b>                                         | $\kappa = 0.588$<br>Sens=100<br>Spec=99.2<br>PPV=41.9<br>NPV=100<br>Accur=99.2              | 1                                                                                |                                                                                   |                                                                                        |                                                                                           |                                                                                                  |                                                                       |
| <b>CDC<br/>(LOS<br/>Restriction)</b>               | $\kappa = 0.439$<br>Sens=68.0<br>Spec=99.2<br>PPV=32.9<br>NPV=99.8<br>Accur=99.1            | $\kappa = 0.927$<br>Sens=86.6<br>Spec=100<br>PPV=100<br>NPV=99.8<br>Accur=99.8   | 1                                                                                 |                                                                                        |                                                                                           |                                                                                                  |                                                                       |
| <b>CDC<br/>(Bateman<br/>Modification)</b>          | $\kappa = 0.716$<br>Sens=100<br>Spec=99.6<br>PPV=56.0<br>NPV=100<br>Accur=99.6              | $\kappa = 0.492$<br>Sens=43.5<br>Spec=99.6<br>PPV=58.1<br>NPV=99.3<br>Accur=98.9 | $\kappa = 0.366$<br>Sens=34.7<br>Spec=99.4<br>PPV=40.2<br>NPV=99.3<br>Accur=98.7  | 1                                                                                      |                                                                                           |                                                                                                  |                                                                       |
| <b>CDC, BC<br/>Analog</b>                          | $\kappa = 0.086$<br>Sens=8.42<br>Spec=99.6<br>PPV=9.8                                       | $\kappa = 0.109$<br>Sens=7.8<br>Spec=99.6<br>PPV=21.8                            | $\kappa = 0.119$<br>Sens=8.9<br>Spec=99.6<br>PPV=21.3                             | $\kappa = 0.067$<br>Sens=5.4<br>Spec=99.6<br>PPV=11.3                                  | 1                                                                                         |                                                                                                  |                                                                       |

|                              |                                                                                  |                                                                                  |                                                                                  |                                                                                 |                                                                                |                                                                                 |   |
|------------------------------|----------------------------------------------------------------------------------|----------------------------------------------------------------------------------|----------------------------------------------------------------------------------|---------------------------------------------------------------------------------|--------------------------------------------------------------------------------|---------------------------------------------------------------------------------|---|
|                              | NPV=99.5<br>Accur=99.1                                                           | NPV=98.8<br>Accur=98.4                                                           | NPV=99.0<br>Accur=98.6                                                           | NPV=99.1<br>Accur=98.7                                                          |                                                                                |                                                                                 |   |
| <b>CDC, BC<br/>Augmented</b> | $\kappa = 0.132$<br>Sens=14.3<br>Spec=99.5<br>PPV=13.0<br>NPV=99.5<br>Accur=99.5 | $\kappa = 0.146$<br>Sens=11.2<br>Spec=99.5<br>PPV=24.3<br>NPV=98.8<br>Accur=98.8 | $\kappa = 0.154$<br>Sens=12.3<br>Spec=99.5<br>PPV=23.2<br>NPV=99.0<br>Accur=95.5 | $\kappa = 0.105$<br>Sens=9.0<br>Spec=99.5<br>PPV=14.7<br>NPV=99.1<br>Accur=98.6 | $\kappa = 0.877$<br>Sens=100<br>Spec=99.9<br>PPV=78.2<br>NPV=100<br>Accur=99.9 | 1                                                                               |   |
| <b>Bateman</b>               | $\kappa = 0.579$<br>Sens=73.2<br>Spec=99.6<br>PPV=48.3<br>NPV=99.9<br>Accur=99.4 | $\kappa = 0.388$<br>Sens=32.3<br>Spec=99.6<br>PPV=50.7<br>NPV=99.1<br>Accur=98.7 | $\kappa = 0.280$<br>Sens=24.9<br>Spec=99.5<br>PPV=33.9<br>NPV=99.2<br>Accur=98.6 | $\kappa = 0.918$<br>Sens=85.0<br>Spec=100<br>PPV=100<br>NPV=99.9<br>Accur=99.9  | $\kappa = 0.050$<br>Sens=7.7<br>Spec=99.2<br>PPV=4.3<br>NPV=99.6<br>Accur=98.8 | $\kappa = 0.084$<br>Sens=10.8<br>Spec=99.2<br>PPV=7.8<br>NPV=99.5<br>Accur=98.7 | 1 |

Abbreviations: Accur, accuracy; BC, birth certificate; CDC, Centers for Disease Control and Prevention; LOS, length of stay; NPV, negative predictive value; PPV, positive predictive value; Sens, sensitivity; SMM, severe maternal morbidity; Spec, specificity.

<sup>a</sup> The SMM definition in the column is treated as the “truth” and the definition in the row is treated as the “test” for sensitivity, specificity, PPV, and NPV.

## Web References

1. Centers for Disease Control and Prevention. Severe maternal morbidity indicators and corresponding ICD-9-CM codes during delivery hospitalizations. <https://www.cdc.gov/reproductivehealth/maternalinfanthealth/smm/severe-morbidity-ICD.htm>. Published 2019. Accessed December 17, 2019.
2. Bateman BT, Mhyre JM, Hernandez-Diaz S, et al. Development of a comorbidity index for use in obstetric patients. *Obstetr Gynecol*. 2013;122(5):957–965.
